# Supplementary material for: Investigating the relationship between changes in collagen fiber orientation during skin aging and collagen/water interactions by polarized-FTIR microimaging
Source: Royal Society of Chemistry journal article supplement (doi:10.1039/c5an00278h), 2015-01-01

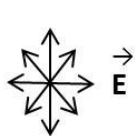

Unpolarized mode

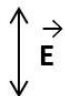

Perpendicular polarization

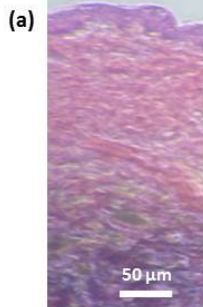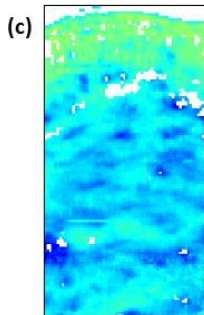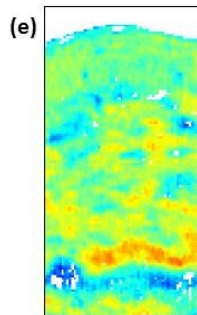

Collagen fiber  
orientation  
to the skin surface

Amide I/II ratio

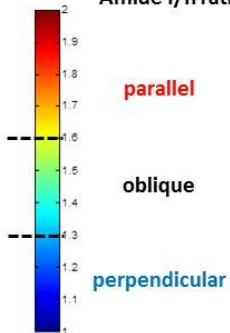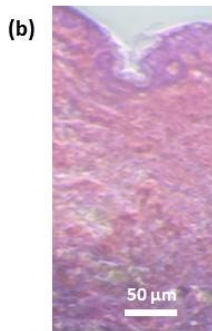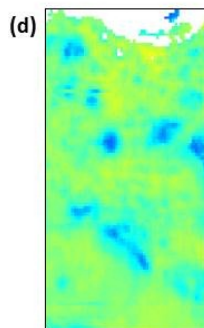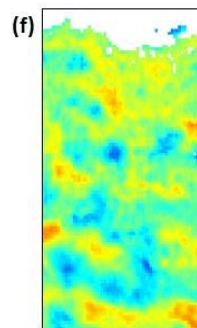

Supplement: c5an00278h2.pdf [file c5an00278h2.pdf]
