# Supplementary figures and images for: Investigating the relationship between changes in collagen fiber orientation during skin aging and collagen/water interactions by polarized-FTIR microimaging
Source: Royal Society of Chemistry journal article supplement (doi:10.1039/c5an00278h), 2015-01-01

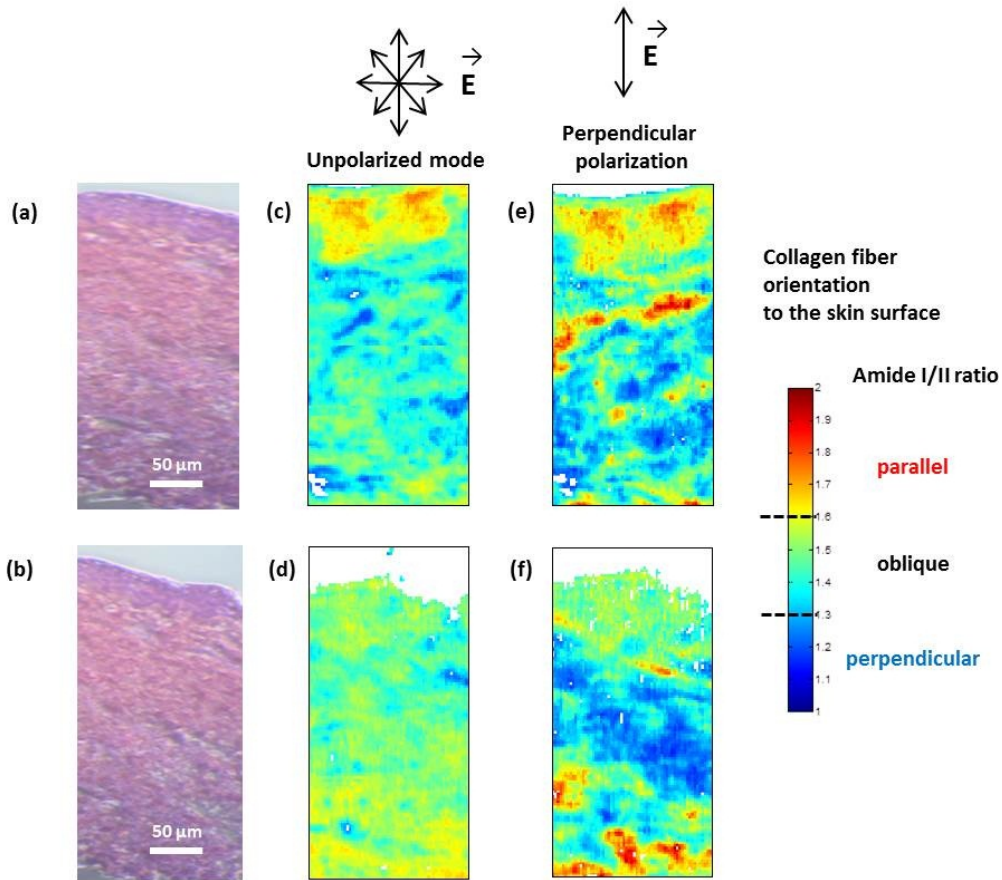

Supplement: c5an00278h3.pdf [file c5an00278h3.pdf]

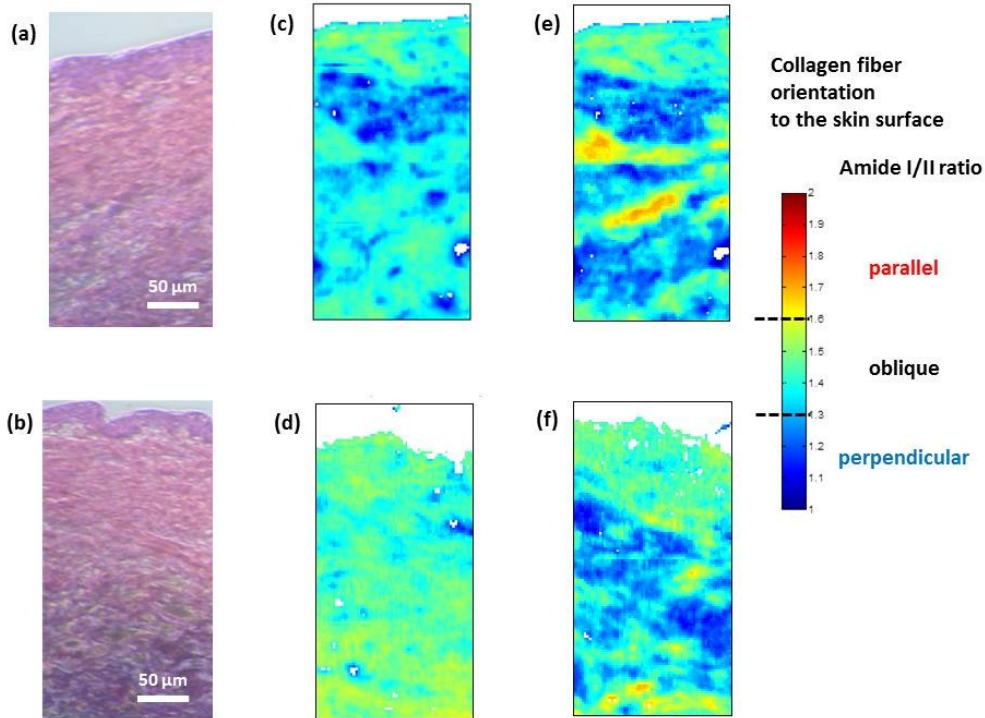

Supplement: c5an00278h4.pdf [file c5an00278h4.pdf]

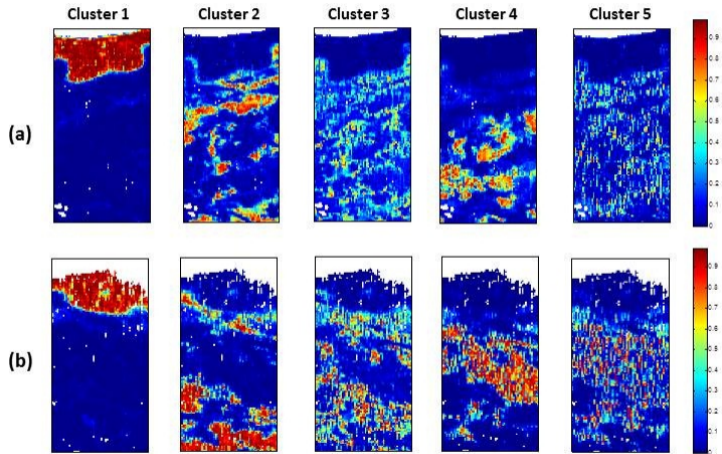

Supplement: c5an00278h6.pdf [file c5an00278h6.pdf]

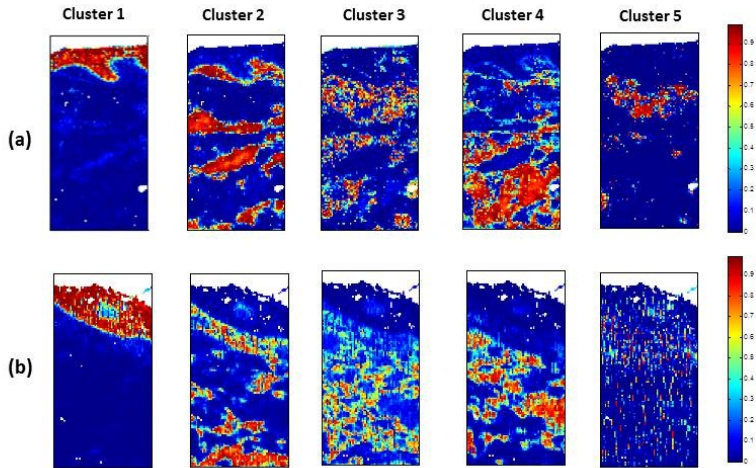

Supplement: c5an00278h7.pdf [file c5an00278h7.pdf]

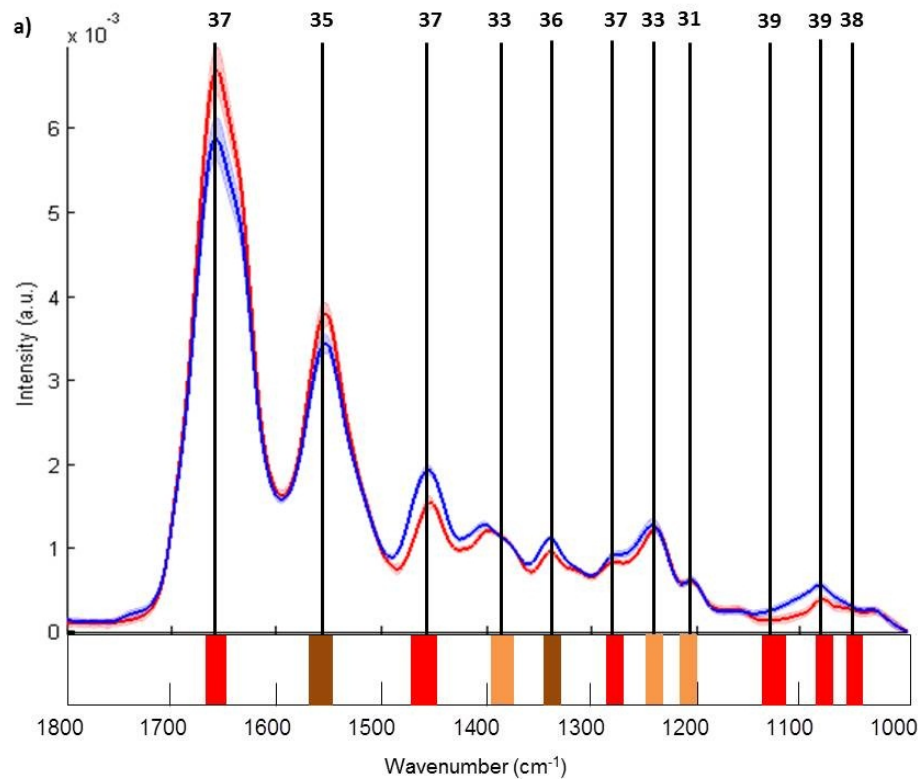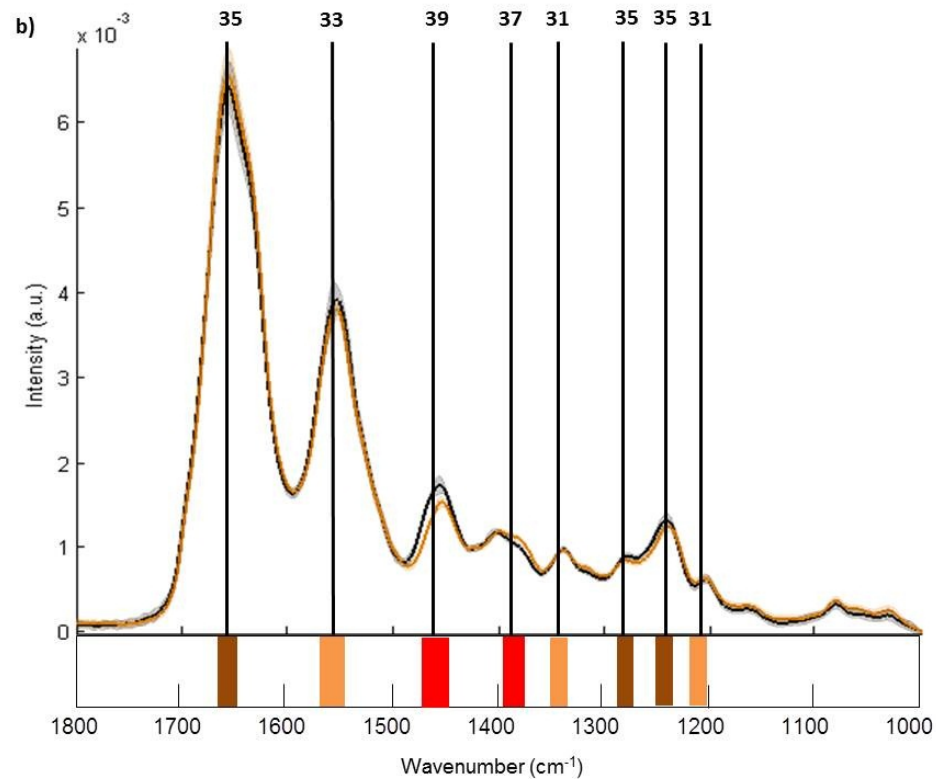

Supplement: c5an00278h8.pdf [file c5an00278h8.pdf]
